# Supplementary material for: Chemical synthesis of oligodeoxyribonucleotides containing N3- and O4-carboxymethylthymidine and their formation in DNA
Source: PubMed Central journal article supplement — Nucleic Acids Res. 2008 Nov 28;37(2):336–45. doi: 10.1093/nar/gkn946 (PMC2632895; doi:10.1093/nar/gkn946), 2008-11-28
Supplement: gkn946_1.pdf [file gkn946_1.pdf]

Supplementary Materials for

**Chemical Synthesis of  
Oligodeoxyribonucleotides Containing *N*3- and  
*O*4-carboxymethylthymidine and Their Formation  
in DNA” (NAR-01852-M-2008).**

Jianshuang Wang and Yinsheng Wang

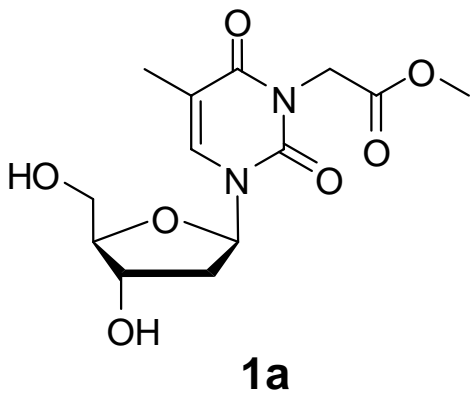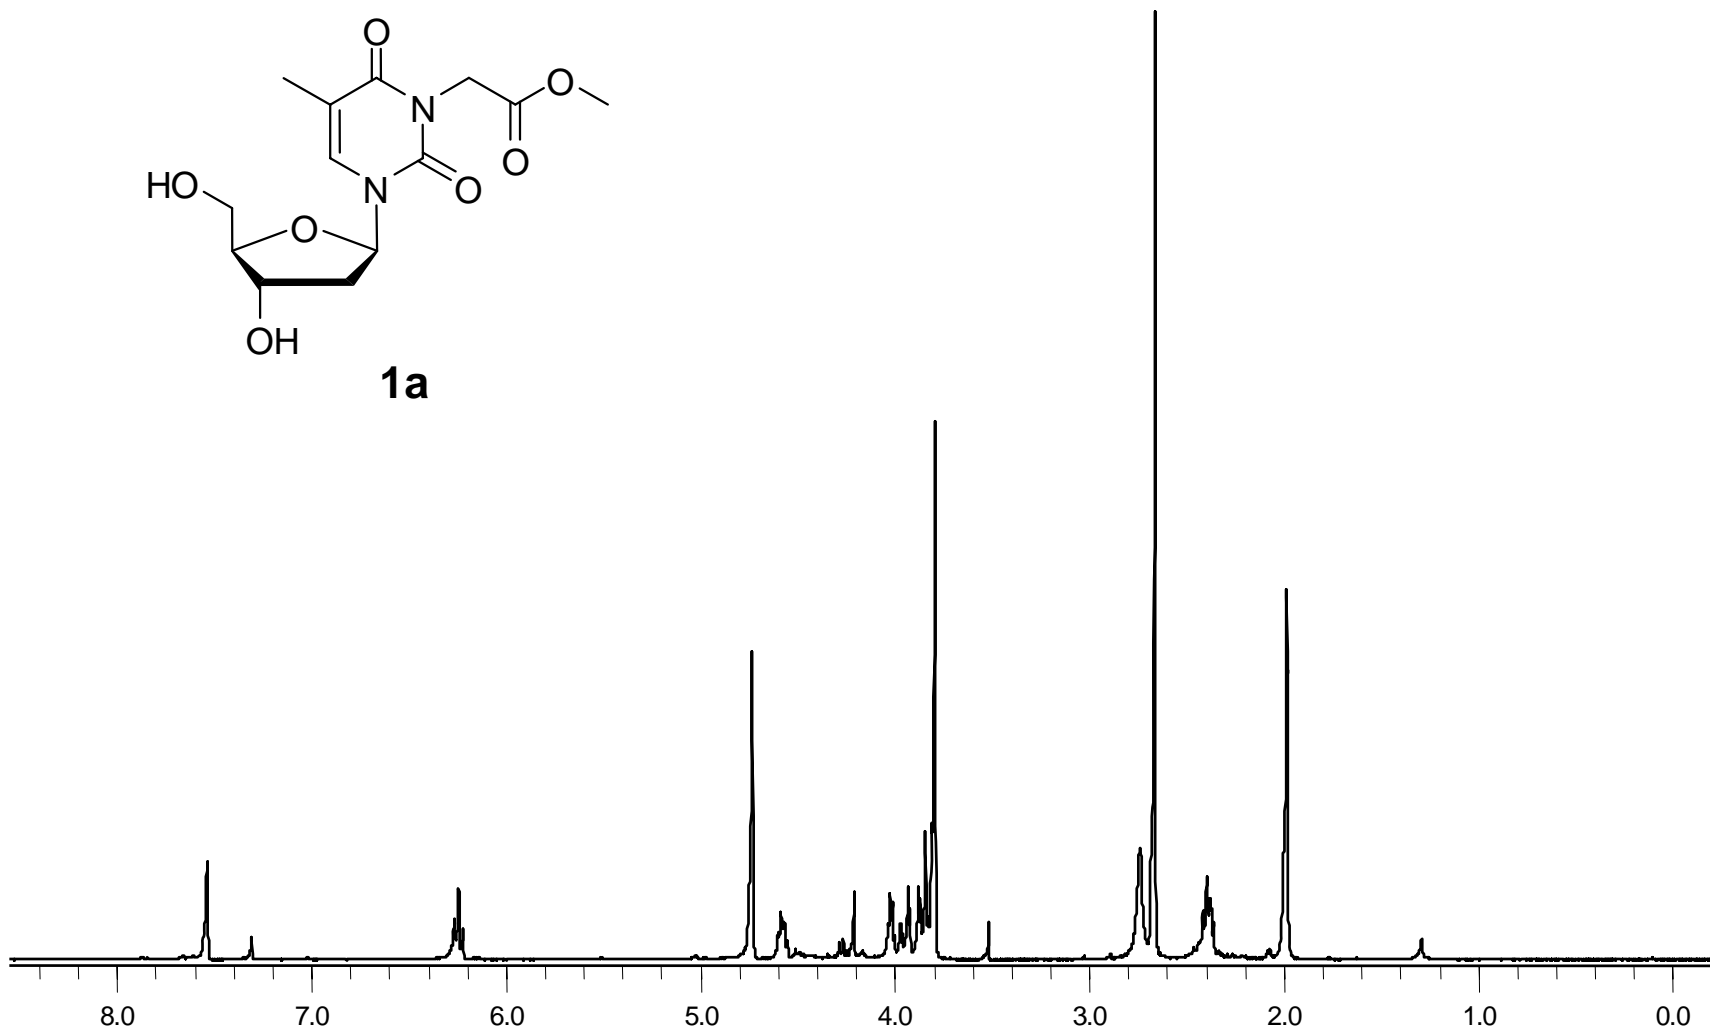

Figure S1.  $^1\text{H}$  NMR of *N*3-methoxycarbonylmethylthymidine (300 MHz,  $\text{CDCl}_3$ , 25  $^\circ\text{C}$ ).

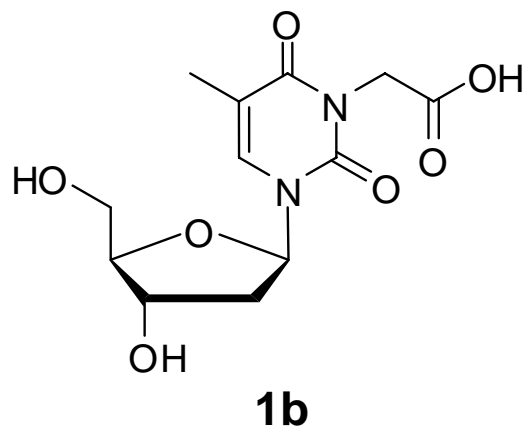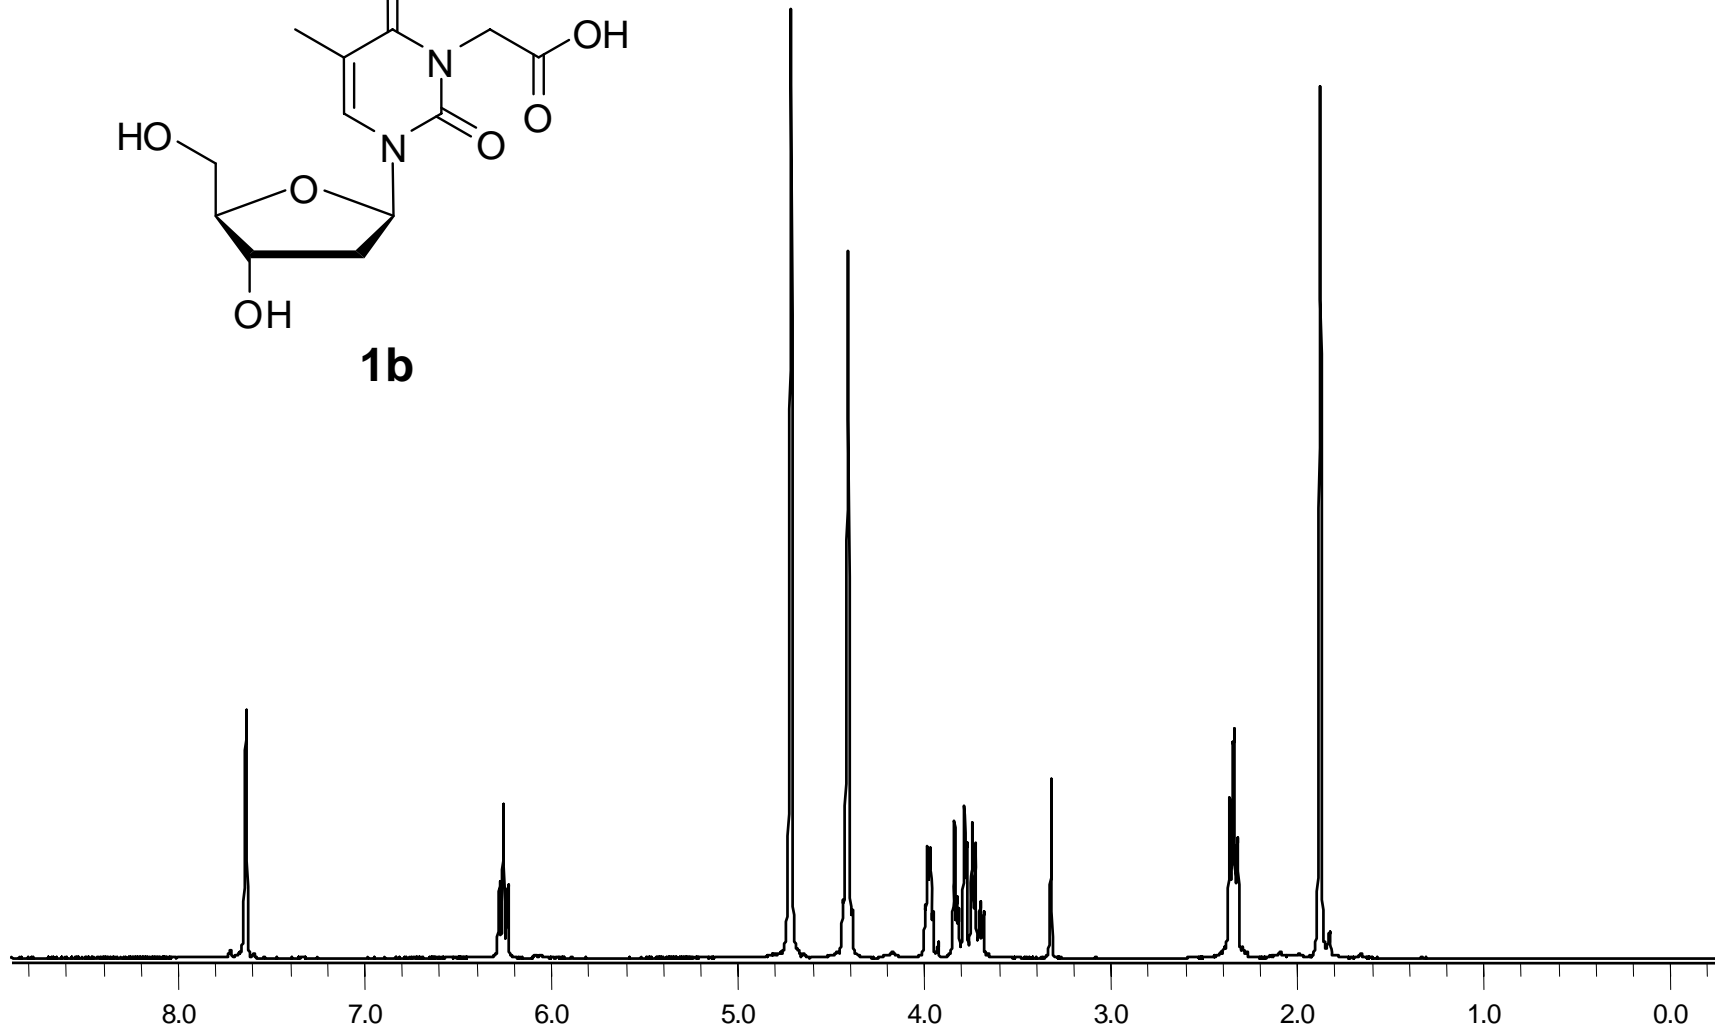

Figure S2. <sup>1</sup>H NMR of *N*<sup>3</sup>-carboxymethylthymidine (300 MHz, D<sub>2</sub>O, 25 °C).

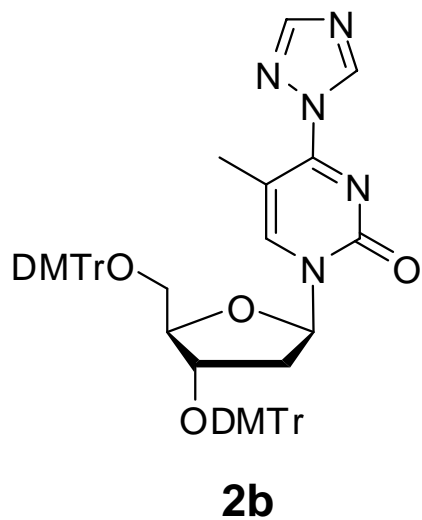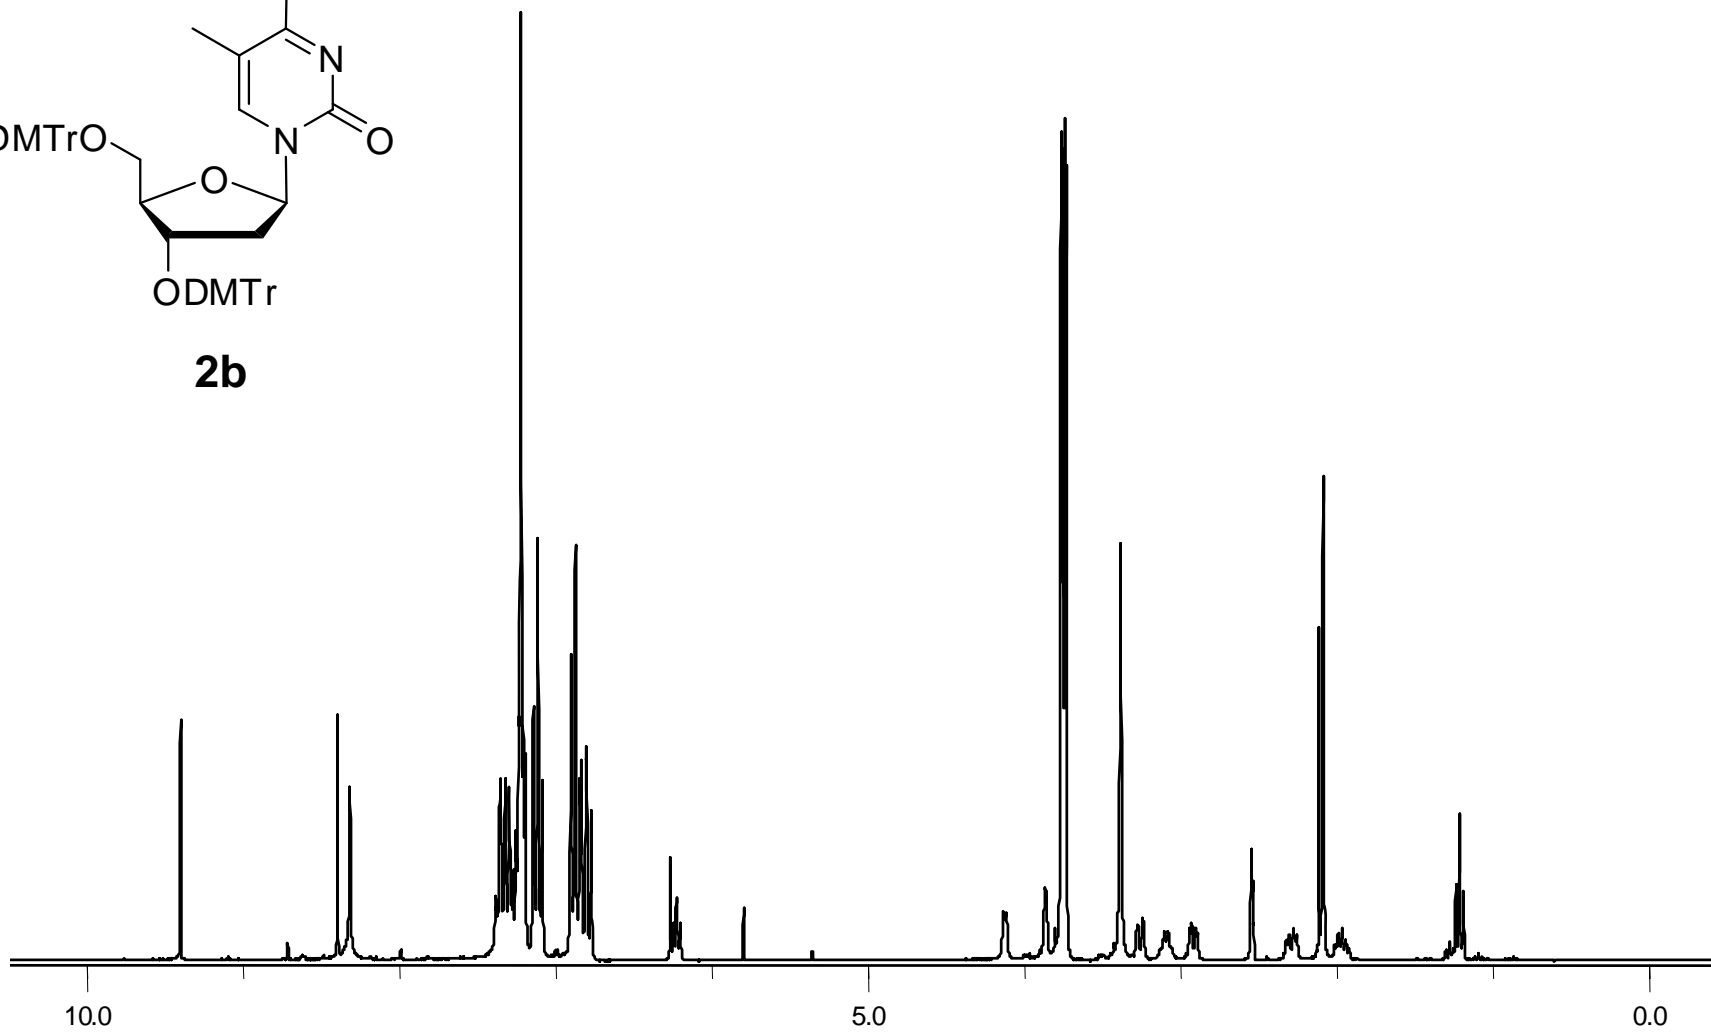

Figure S3.  $^1\text{H}$  NMR spectrum of 3',5'-O-di(4,4'-dimethoxytrityl)-4-O-triazolylthymidine (300 MHz,  $\text{DMSO-}d_6$ , 25  $^\circ\text{C}$ ).

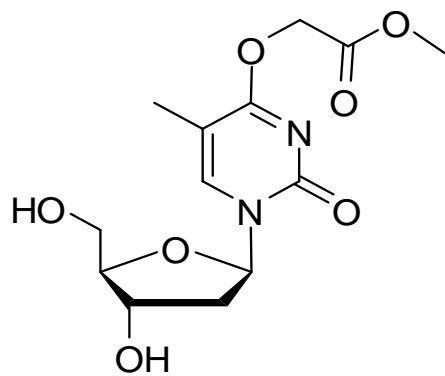

**2c**

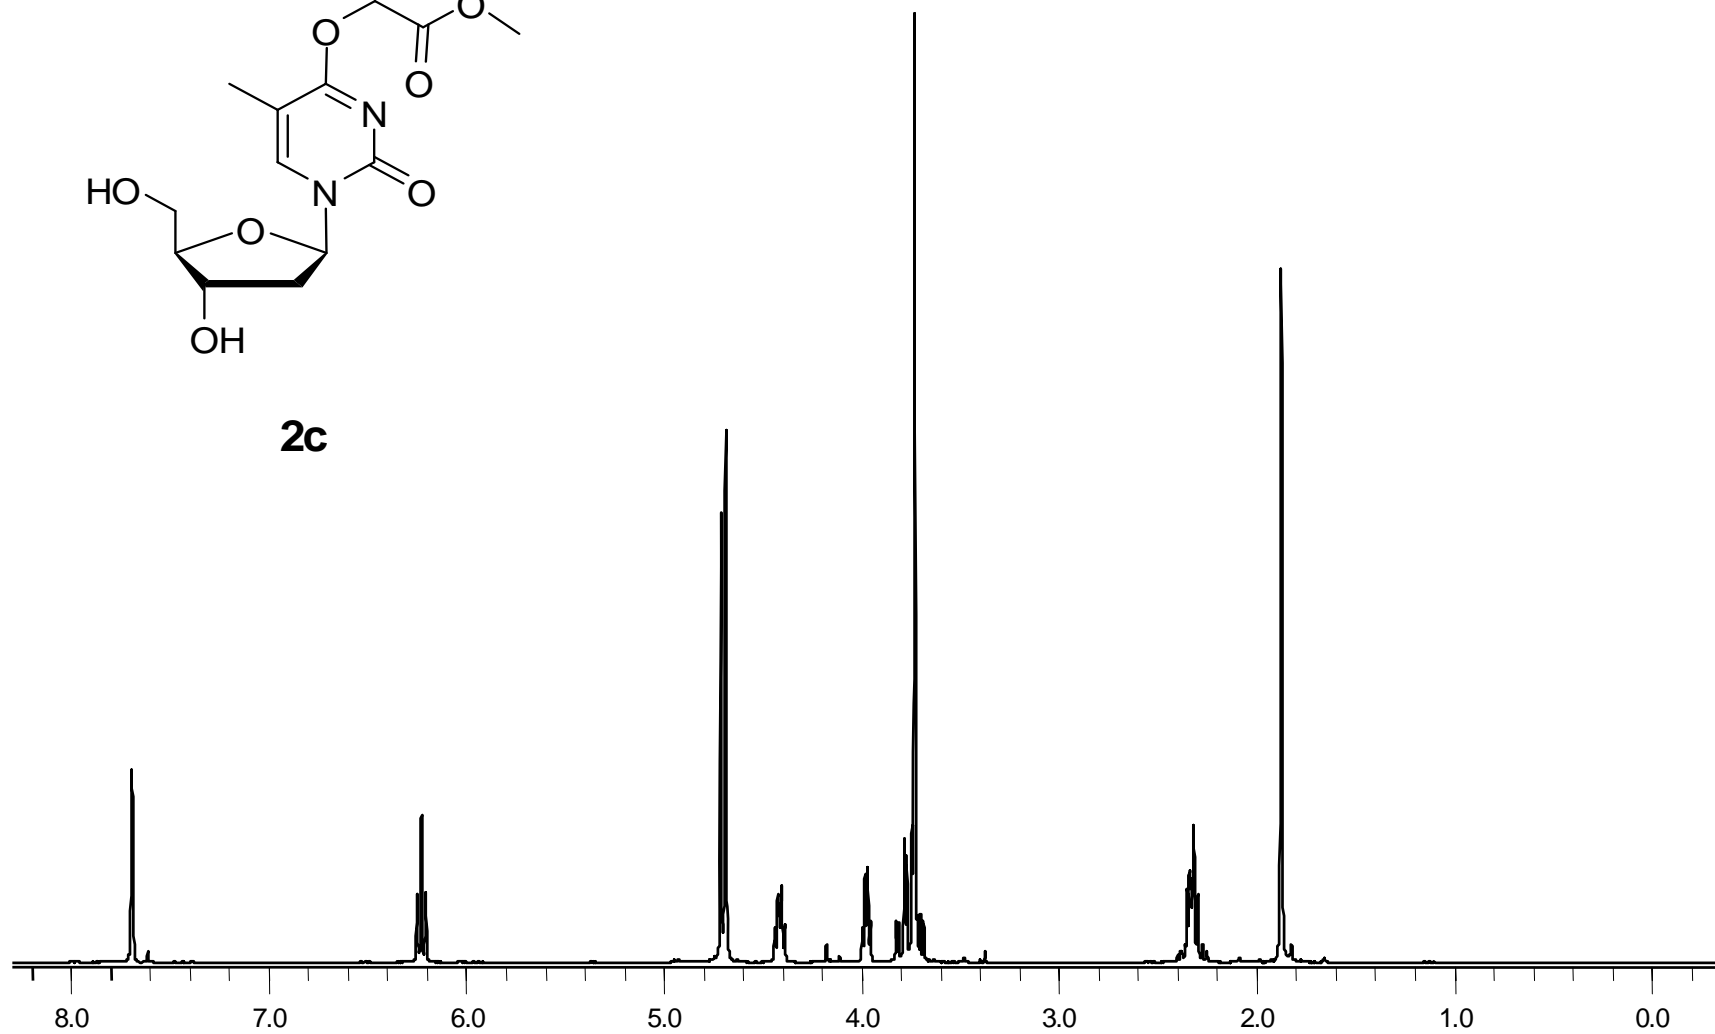

Figure S4. <sup>1</sup>H NMR spectrum of *O*<sup>4</sup>-methoxycarbonylmethylthymidine (300 MHz, D<sub>2</sub>O, 25 °C).

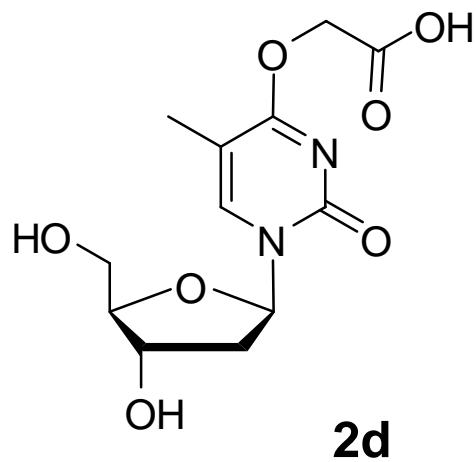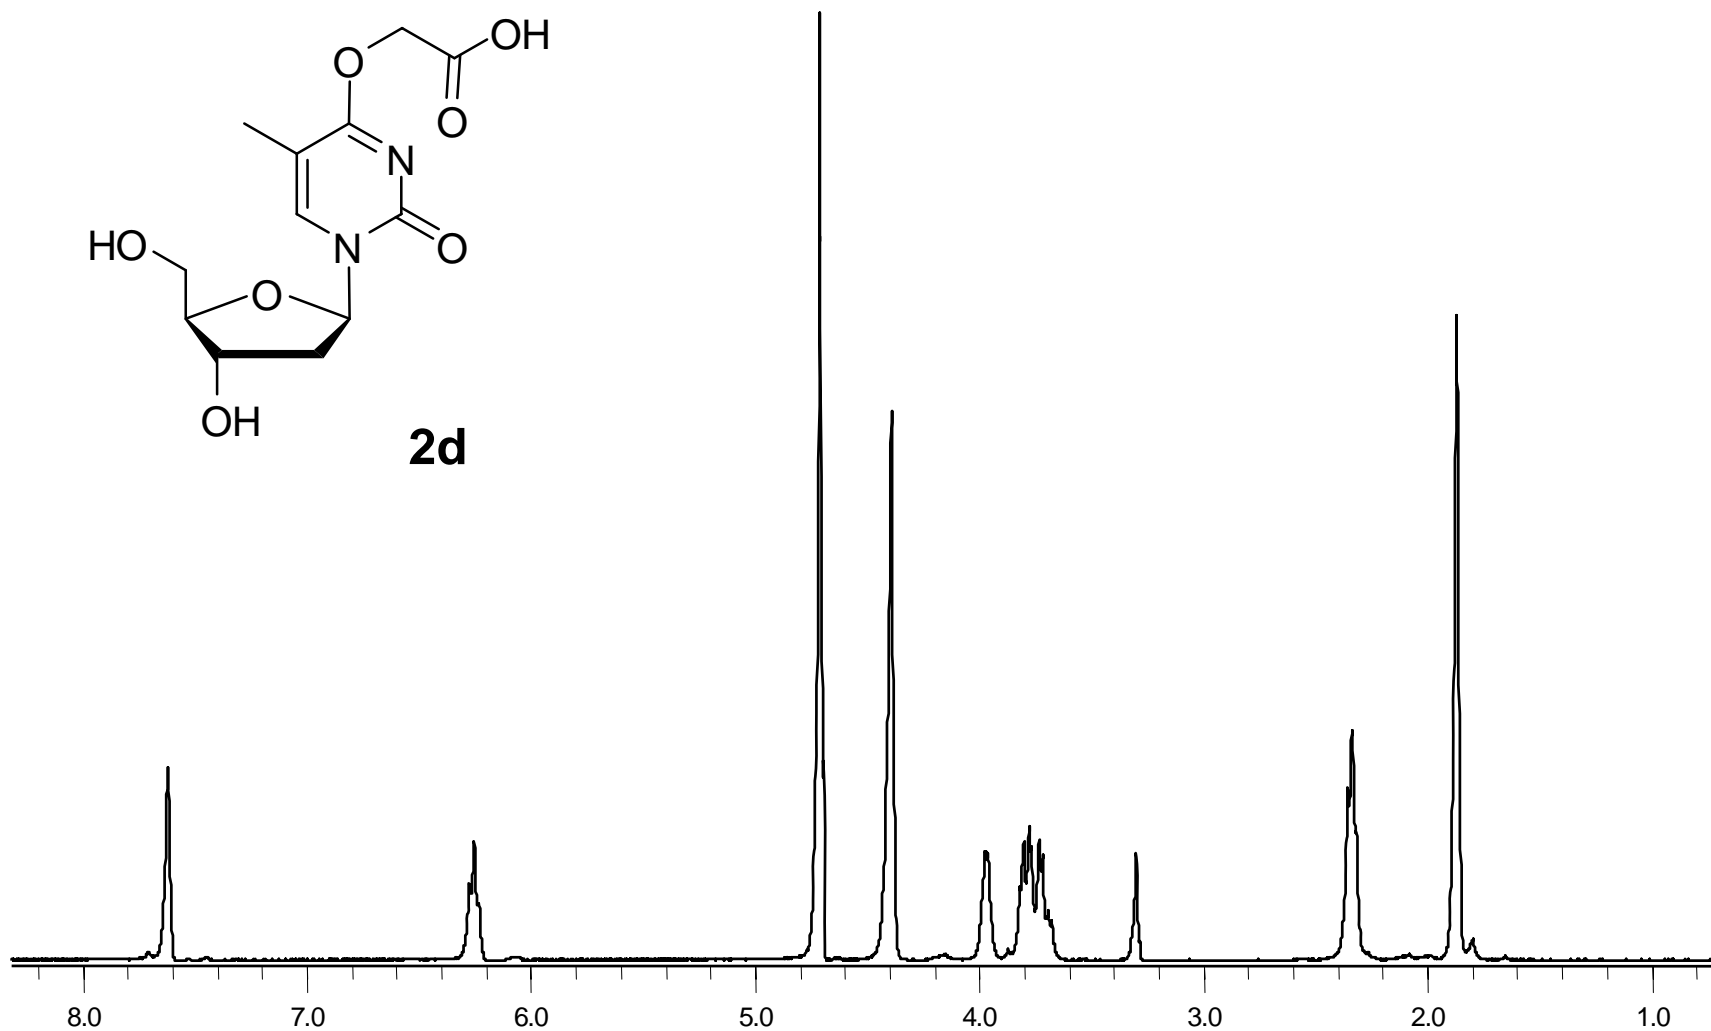

Figure S5.  $^1\text{H}$  NMR spectrum of *O*<sup>4</sup>-carboxymethylthymidine (300 MHz,  $\text{D}_2\text{O}$ , 25 °C).

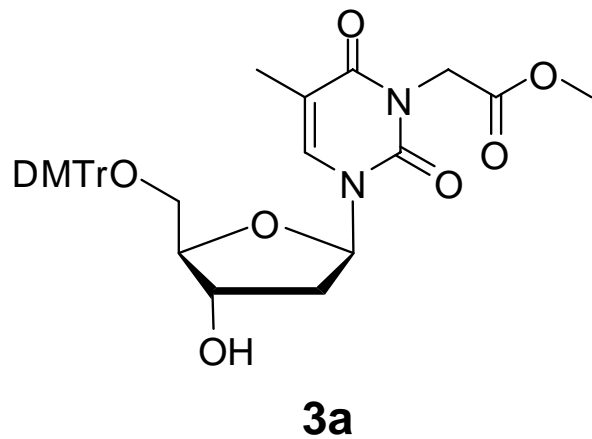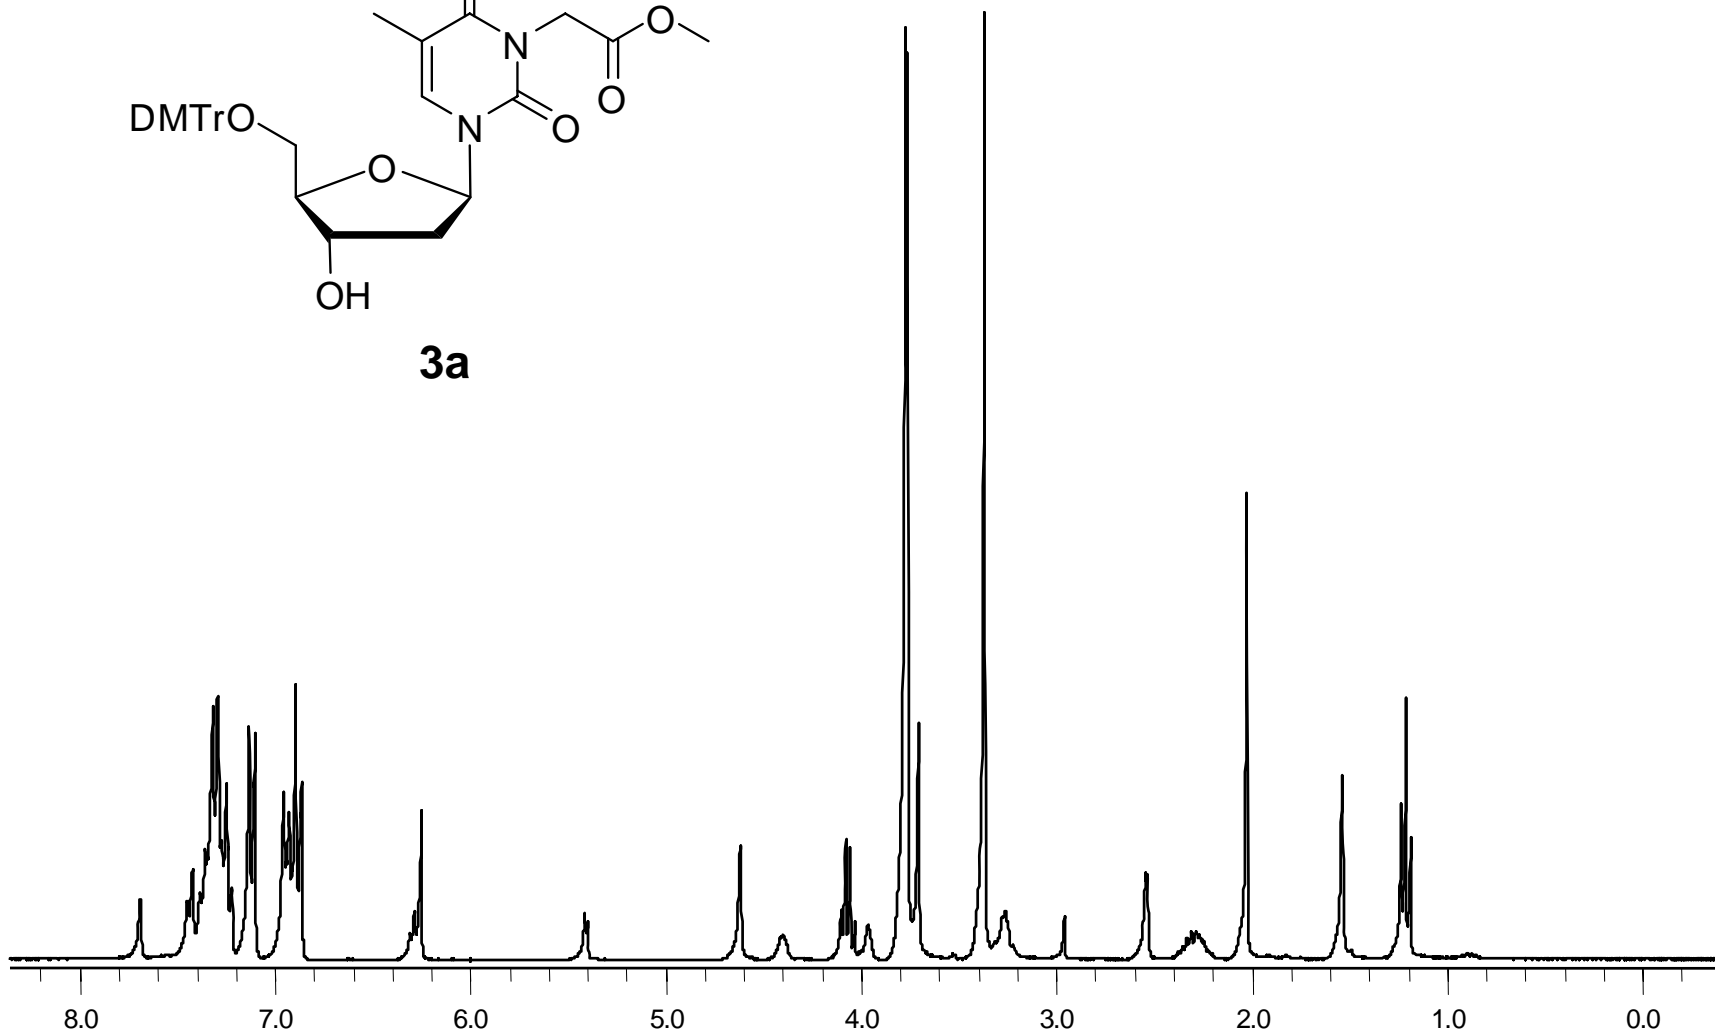

Figure S6.  $^1\text{H}$  NMR spectrum of 5'-O-(4,4'-dimethoxytrityl)-*N*3-methoxycarbonylmethylthymidine (300 MHz,  $\text{DMSO-}d_6$ ,  $25^\circ\text{C}$ ).

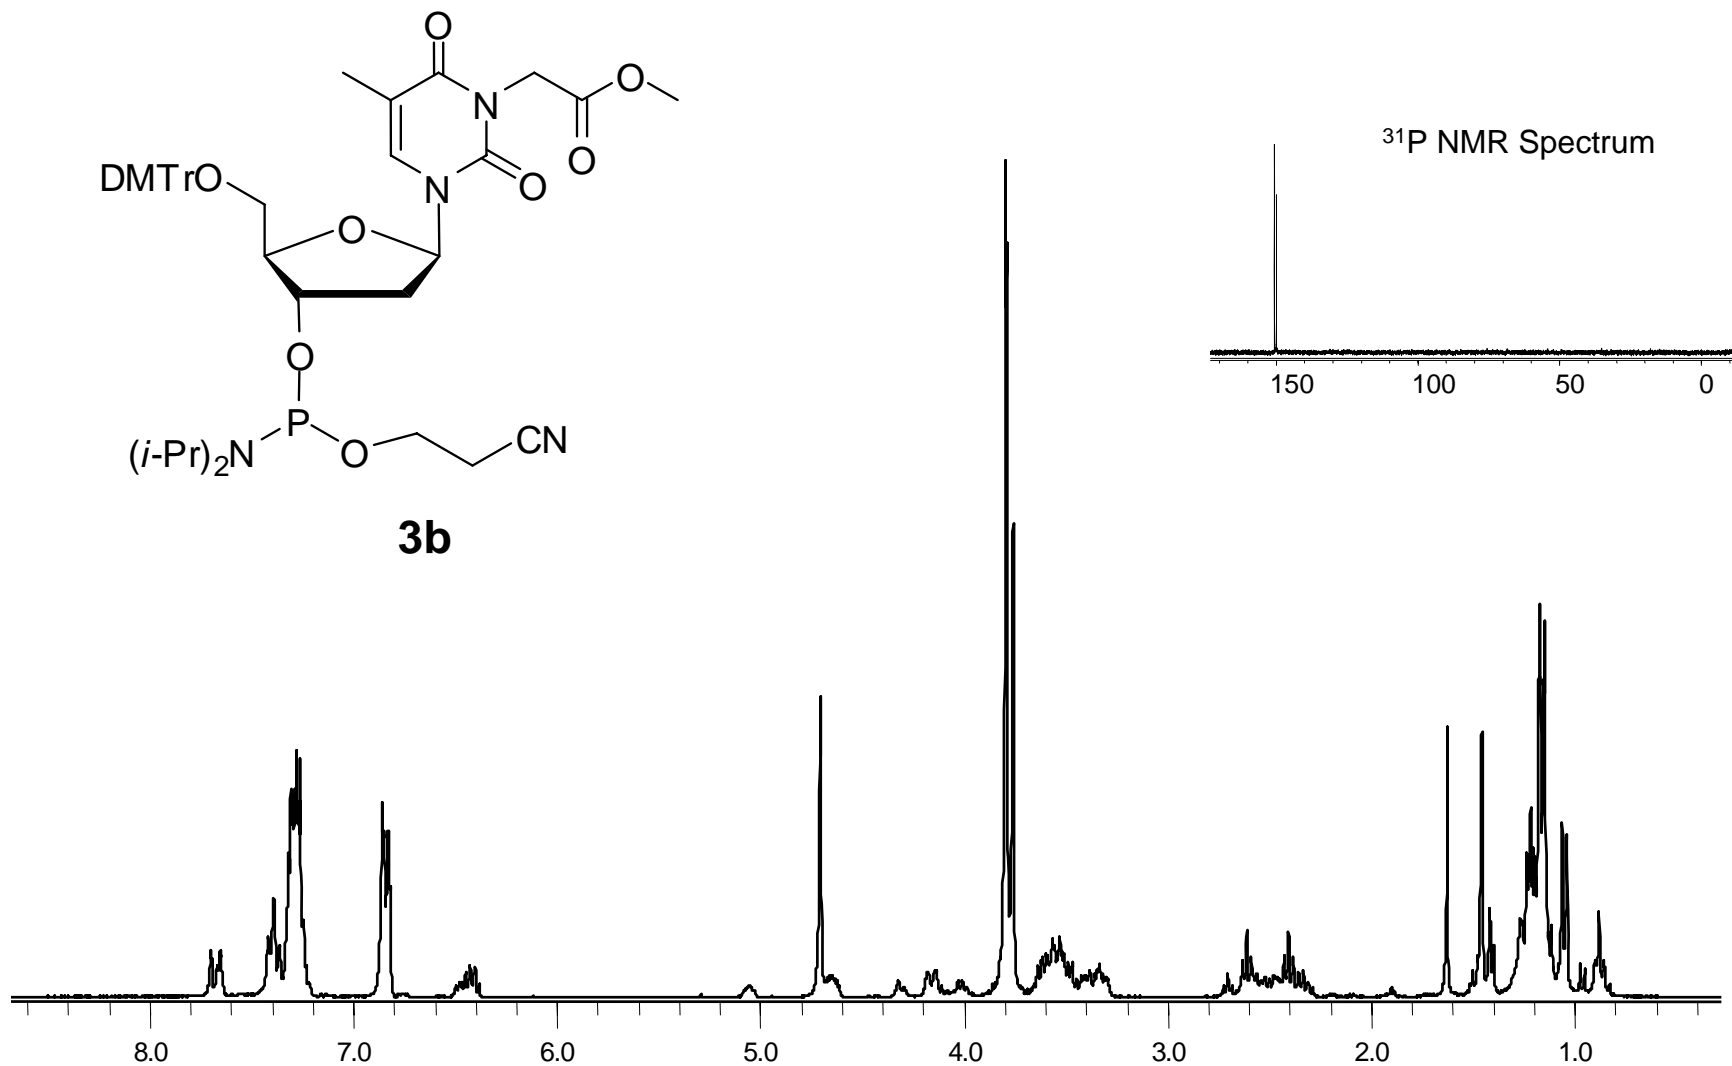

Figure S7. <sup>1</sup>H NMR spectrum of 5'-O-(4,4'-dimethoxytrityl) thymidine-3'-O-[(2-cyanoethyl)-N,N-diisopropylphosphoramidite] (300 MHz, CDCl<sub>3</sub>, 25 °C). The insert is a <sup>31</sup>P NMR spectrum of this compound at 80 MHz.



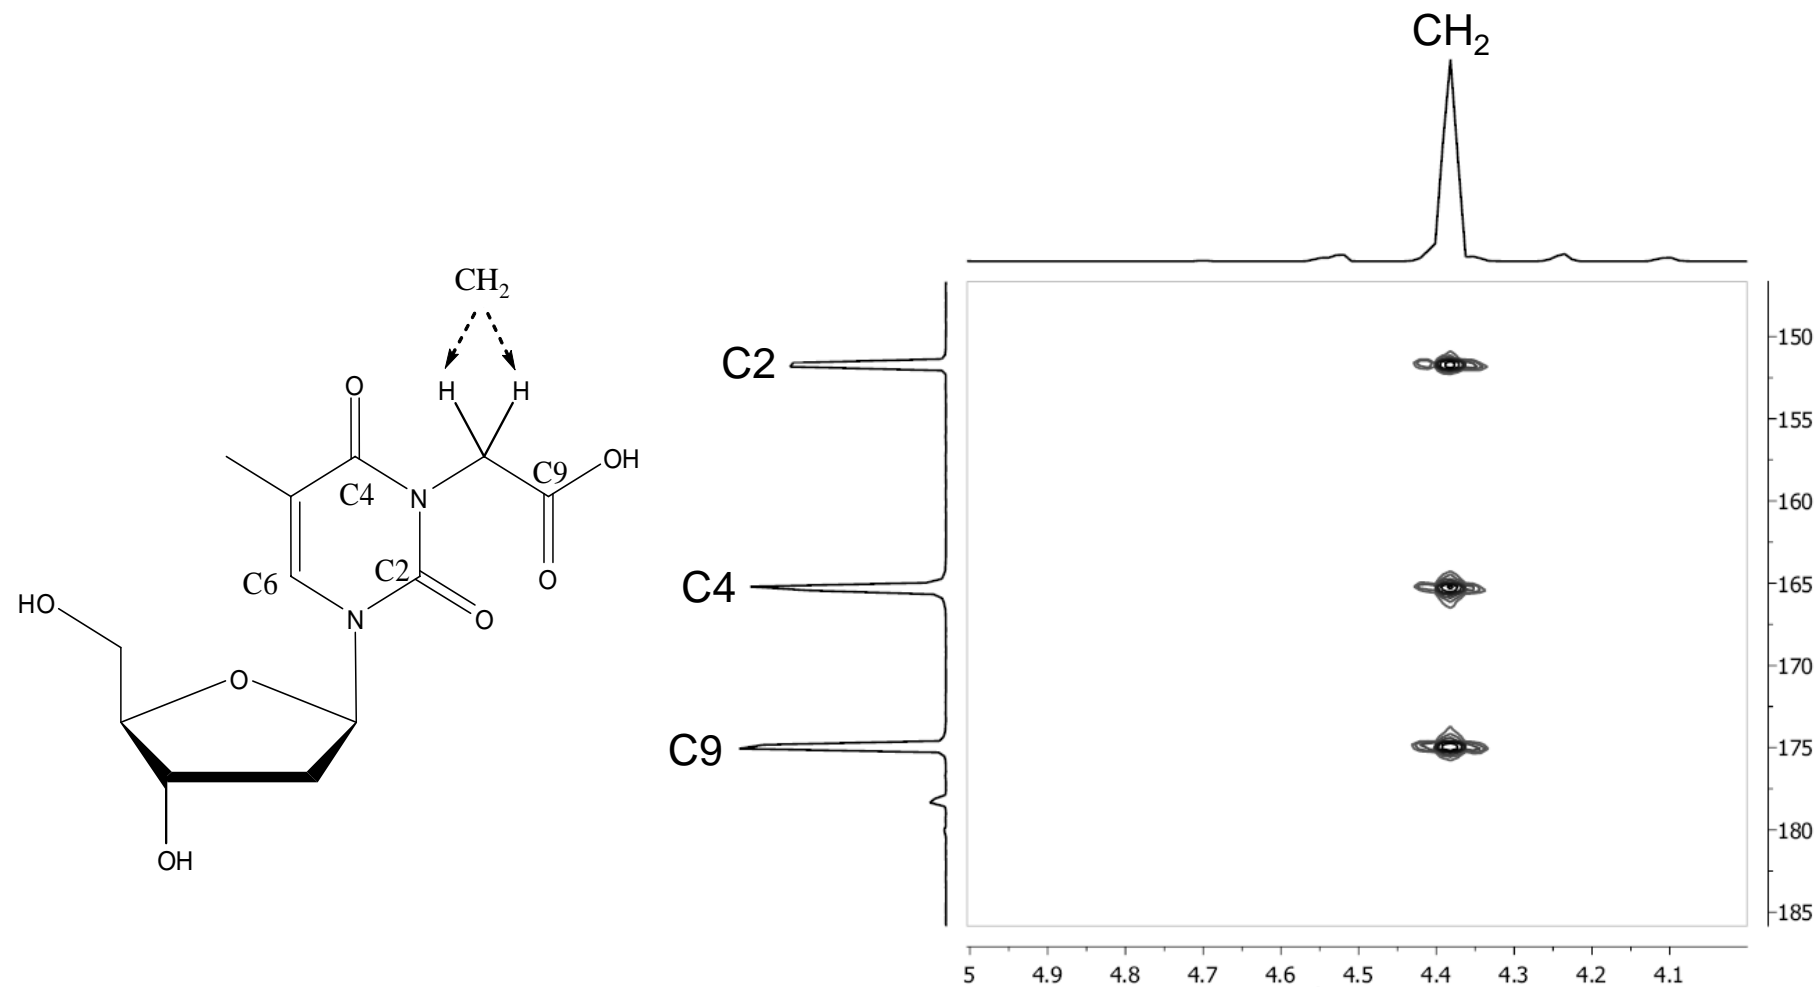

Figure S8. A portion of the 2-D HMBC spectrum of *N*<sup>3</sup>-carboxymethylthymidine (500 MHz, D<sub>2</sub>O, 25 °C) showing the correlation between the methylene protons of the carboxymethyl functionality and the carbon atoms of the thymine ring.

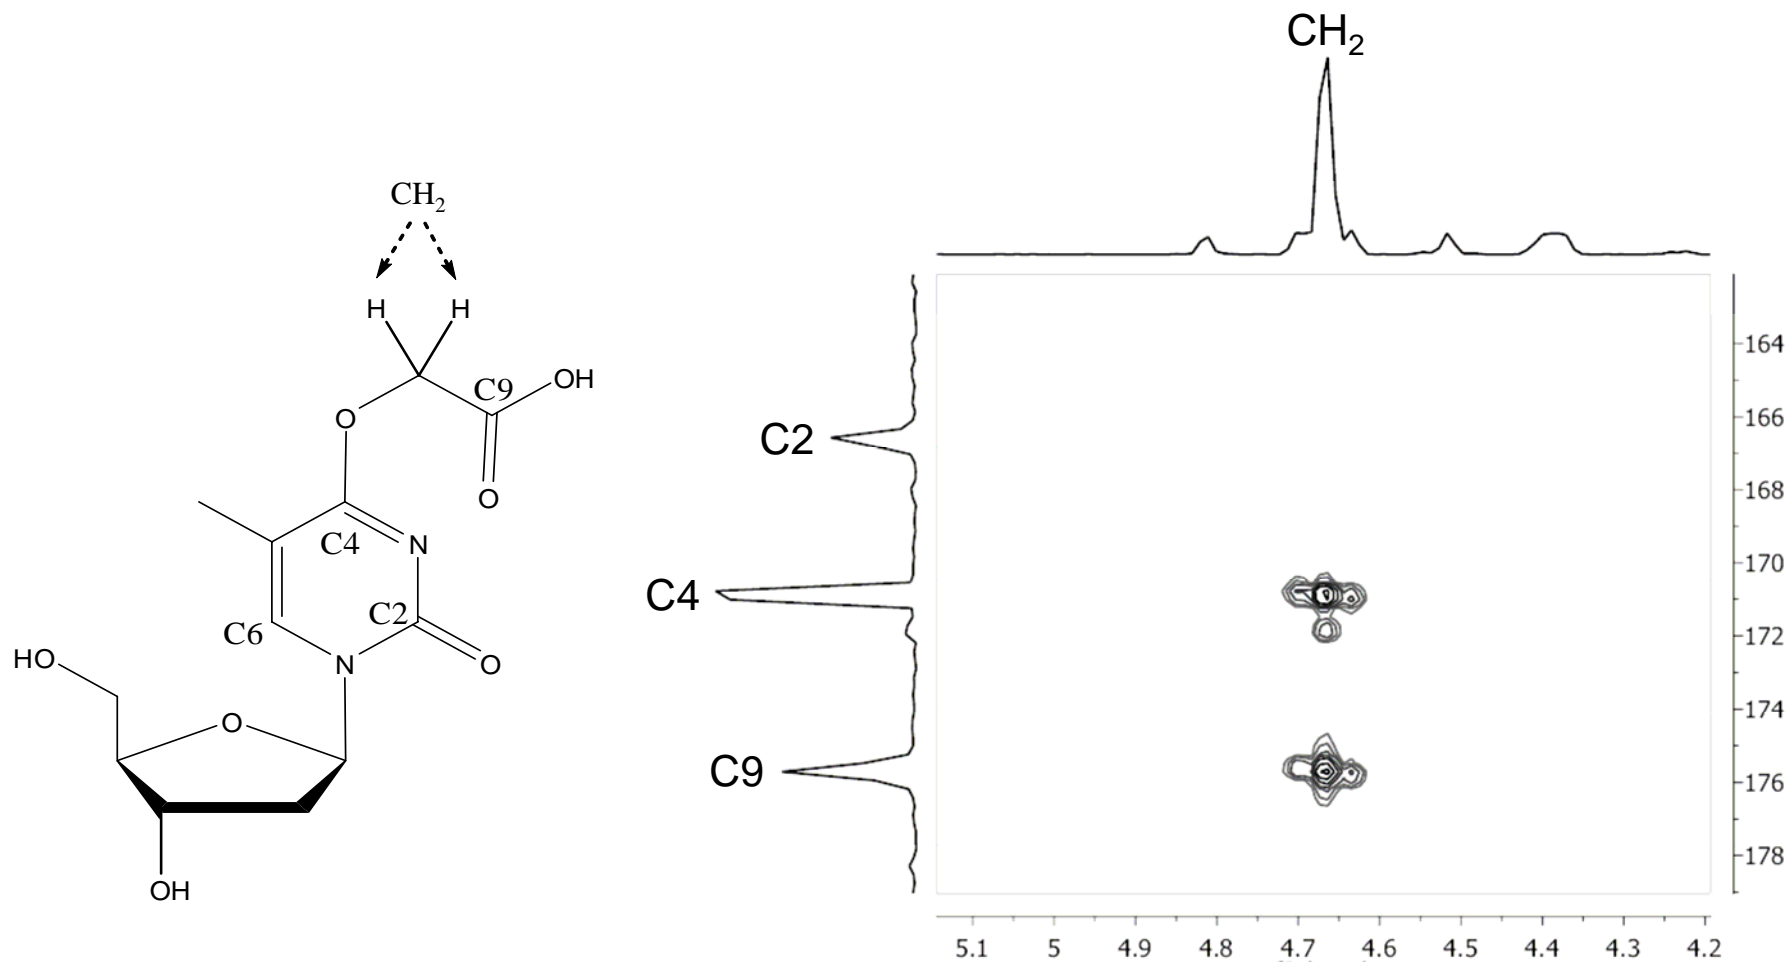

Figure S9. A portion of the 2-D HMBC spectrum of *O*<sup>4</sup>-carboxymethylthymidine (500 MHz, D<sub>2</sub>O, 25 °C) showing the correlation between the methylene protons of the carboxymethyl functionality and the carbon atom of the thymine ring.
